# Supplementary material for: Divergence in gene regulation at young life history stages of whitefish (Coregonus sp.) and the emergence of genomic isolation
Source: Springer Nature journal article supplement (doi:10.1186/1471-2148-9-59), 2009-01-01
Supplement: Additional file 3 [file 1471-2148-9-59-s3.doc]

| **EST clone ID** | **Accession Number** | **Gene** | **Biological Function** | **Juvenile fish (whole)** | **Adult Muscle**  **[20]** | **Adult Liver**  **[22]** | **Congruent**  **changes** |
| --- | --- | --- | --- | --- | --- | --- | --- |
| CB496806; CA042792 | O13085 | Cytochrome c oxidase polypeptide VIa, mitochondrial precursor | EM | down | down | down | yes |
| CA039027; CA768062; CB491826; CB493574; CB491157; CB497681; CK991014; CB498361 | P00355 | Glyceraldehyde-3-phosphate dehydrogenase | EM | up | - | up | yes |
| CB514705; CB496739; CA062911; CB493709; CB517144 | P05065 | Fructose-bisphosphate aldolase A | EM | up | - | up | yes |
| CA057166; CB492725; CA041894; CB494346; CB509700 | P15429 | Beta-enolase | EM | up | up | - | yes |
| CB491722; CB497381; CB493362; CB497649; CB491722; CB497381; CB493362; CB497649; CB497649 | P19804 | Nucleoside diphosphate kinase B | EM | down | down | down | yes |
| CK990485 | P35031 | Trypsin-1 precursor | EM | up | - | up | yes |
| CB510934; CB492030; CB511030; CA042095; CB492512; CB510537; CB497378; CB493401; CB510934; CB492030; CB511030; CA042095; CB492512; CB510537; CB497378; CB493401 | Q05982 | Nucleoside diphosphate kinase A | EM | down | down | down | yes |
| BU965756; CB514460; CA050886; CB508064 | Q4KYY3 | Glyceraldehyde-3-phosphate dehydrogenase | EM | up | - | up | yes |
| CB496407 | P56533 | Betaine aldehyde dehydrogenase | DT | up | - | up | yes |
| CB504199; CK990712 | P80856 | Gastrotropin | LM | up | - | up | yes |
| CB509509; CA036673; CB501248 | P24774 | Plasma retinol-binding protein I | BT | down | - | up | no |
| CA054829 | Q56TU0 | Type-4 ice-structuring protein precursor | BT | down | - | up | no |
| CA037885 | O13085 | Cytochrome c oxidase polypeptide VIa, mitochondrial precursor | EM | up | down | down | no |
| CA056752 | P00940 | Triosephosphate isomerase | EM | up | down | - | no |
| CB508872; CB505763; CK990951 | P23591 | GDP-L-fucose synthetase | EM | down | - | up | no |
| CB498577; CB510792; CB509391; CB493676; CA038871; CB510589 | P28022 | Gamma crystallin M3 | EM | down | up | - | no |
| CB498361 | Q05025 | Glyceraldehyde-3-phosphate dehydrogenase | EM | up | down | up | no |
| CA061998 | P24723 | Protein kinase C eta type | GLF | down | - | up | no |
| CB497373; CB496526; CA039335 | P68246 | Troponin I, fast skeletal muscle | MCR | down | down | up | no |
| CB496805 | P68246 | Troponin I, fast skeletal muscle | MCR | up | down | up | no |
| CB493603; CB509706 | Q9I8V0 | Parvalbumin-2 | MCR | down | up | - | no |
| CB493454; CB510500; CA043176; CB492836; CB511307; CB497818; CB509992; CA045988; CB493454; CB510500; CA043176; CB492836; CB511307; CB497818; CB509992; CA045988 | Q01584 | Lipocalin precursor | OF | down | down | up | no |
| CK990562 | Q9GKL8 | Cathepsin L precursor | PD | down | - | up | no |
| CK991302 | P27797 | Calreticulin precursor | PS | up | - | down | no |
| CA063352 | P80311 | Peptidyl-prolyl cis-trans isomerase B precursor | PS | up | - | down | no |
| CK990518 |  | UNKNOWN | UNKNOWN | down | - | up | no |
